# Supplementary material for: Global research trends in myelodysplastic syndromes drug resistance: A comprehensive bibliometric and knowledge mapping study
Source: Research Square preprint supplement (doi:10.21203/rs.3.rs-8522773/v1), 2026-01-06
Supplement: Supplementary file 1 [file 4a758274bc9faecd584692b0.docx]

**Table S4**. Top 10 highly co-cited references in myelodysplastic syndromes drug resistance research.

| Rank | Co-cited reference | Citations |
| --- | --- | --- |
| 1 | Fenaux P, 2009, Lancet Oncol, V10, P223 | 115 |
| 2 | Ley TJ, 2013, New Engl J Med, V368, P2059 | 65 |
| 3 | Kantarjian H, 2006, Cancer-Am Cancer Soc, V106, P1794 | 62 |
| 4 | Aarber DA, 2016, Blood, V127, P2391 | 59 |
| 5 | Dinardo CD, 2020, New Engl J Med, V383, P617 | 58 |
| 6 | Dohner H, 2017, Blood, V129, P424 | 57 |
| 7 | Greenberg P, 1997, Blood, V89, P2079 | 57 |
| 8 | Fenaux P, 2010, J Clin Oncol, V28, P562 | 55 |
| 9 | Papaemmanuil E, 2016, New Engl J Med, V374, P2209 | 53 |
| 10 | Dinardo CD, 2019, Blood, V133, P7 | 53 |
