# Supplementary material for: Global research trends in myelodysplastic syndromes drug resistance: A comprehensive bibliometric and knowledge mapping study
Source: Research Square preprint supplement (doi:10.21203/rs.3.rs-8522773/v1), 2026-01-06
Supplement: Supplementary file 2 [file 747c0a8f6584e02c7e760f1f.docx]

**Table S3**. Top 10 journals and co-cited journals in myelodysplastic syndromes drug resistance research.

| Rank | Journal | Count | IF | JCR | Co-cited Journal | Co-citation | IF | JCR |
| --- | --- | --- | --- | --- | --- | --- | --- | --- |
| 1 | Leukemia | 30 | 12.8 | Q1 | Blood | 8383 | 21.0 | Q1 |
| 2 | Blood | 29 | 21.0 | Q1 | Leukemia | 2876 | 12.8 | Q1 |
| 3 | Cancers | 28 | 4.5 | Q1 | Journal of Clinical Oncology | 2109 | 42.1 | Q1 |
| 4 | Leukemia Research | 24 | 2.1 | Q3 | New England Journal of Medicine | 1374 | 96.2 | Q1 |
| 5 | Leukemia & Lymphoma | 20 | 2.2 | Q3 | Cancer Research | 1246 | 12.5 | Q1 |
| 6 | International Journal of Molecular Sciences | 15 | 4.9 | Q1 | Nature | 1205 | 50.5 | Q1 |
| 7 | Annals of Hematology | 15 | 3.0 | Q2 | British Journal of Haematology | 1091 | 5.1 | Q1 |
| 8 | British Journal of Haematology | 15 | 5.1 | Q1 | Clinical Cancer Research | 1007 | 10.0 | Q1 |
| 9 | Frontiers in Oncology | 14 | 3.5 | Q2 | Proceedings of the National Academy of Sciences of the United States of America | 842 | 9.4 | Q1 |
| 10 | Haematologica | 14 | 8.2 | Q1 | Leukemia Research | 789 | 2.1 | Q3 |
