# Supplementary material for: Global research trends in myelodysplastic syndromes drug resistance: A comprehensive bibliometric and knowledge mapping study
Source: Research Square preprint supplement (doi:10.21203/rs.3.rs-8522773/v1), 2026-01-06
Supplement: Supplementary file 3 [file 8b5e7bf6079070f70f5974e4.docx]

**Table S2**. Top 10 authors and co-cited authors in myelodysplastic syndromes drug resistance research.

| Rank | Authors | Count | Co-cited authors | Citations |
| --- | --- | --- | --- | --- |
| 1 | Guillermo Garcia-Manero | 18 | C D DiNardo | 252 |
| 2 | Farhad Ravandi | 15 | Pierre Fenaux | 210 |
| 3 | Hagop Kantarjian | 15 | G Garcia-Manero | 195 |
| 4 | Amer M Zeidan | 13 | Hagop Kantarjian | 178 |
| 5 | Marina Konopleva | 10 | Hartmut Dohner | 162 |
| 6 | Gautam Borthakur | 9 | R M Stone | 152 |
| 7 | Courtney D Dinardo | 9 | Naval Daver | 131 |
| 8 | Chunkang Chang | 9 | Amer M Zeidan | 130 |
| 9 | Alan F List | 9 | Jorge E Cortes | 125 |
| 10 | Naval Daver | 8 | Alan K Burnett | 122 |
