# Supplementary material for: Global research trends in myelodysplastic syndromes drug resistance: A comprehensive bibliometric and knowledge mapping study
Source: Research Square preprint supplement (doi:10.21203/rs.3.rs-8522773/v1), 2026-01-06
Supplement: Supplementary file 4 [file e6afba3cb9c001351ea73040.docx]

**Table S1**. The top 10 countries and institutions contributing to myelodysplastic syndromes drug resistance research.

| Rank | Country | Count | Institution | Count |
| --- | --- | --- | --- | --- |
| 1 | United States | 356 | University of Texas MD Anderson Cancer Center (United States) | 61 |
| 2 | China | 127 | Dana–Farber Cancer Institute (United States) | 26 |
| 3 | Germany | 67 | Memorial Sloan Kettering Cancer Center (United States) | 21 |
| 4 | Italy | 56 | Fred Hutchinson Cancer Center (United States) | 20 |
| 5 | Japan | 55 | Cleveland Clinic (United States) | 19 |
| 6 | France | 49 | Johns Hopkins University (United States) | 18 |
| 7 | United Kingdom | 34 | H. Lee Moffitt Cancer Center & Research Institute (United States) | 17 |
| 8 | Canada | 31 | University of Washington (United States) | 17 |
| 9 | Netherlands | 28 | Mayo Clinic (United States) | 16 |
| 10 | Australia | 26 | Harvard Medical School (United States) | 15 |
